# Supplementary material
Source: Springer Nature journal article supplement (https://www.springermedizin.de/resource/supplementary/12955_2012_1095_MOESM2_ESM.pdf/9559260)

## MORS (Child)

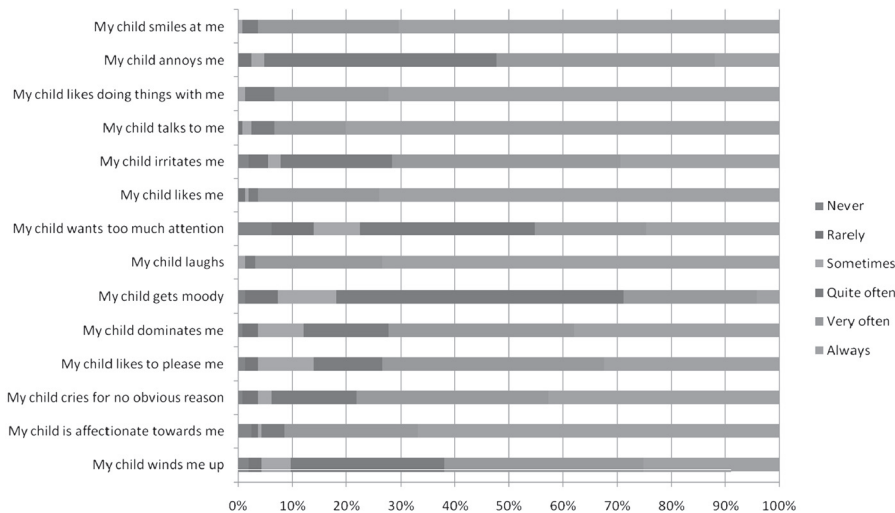

## C-PRS

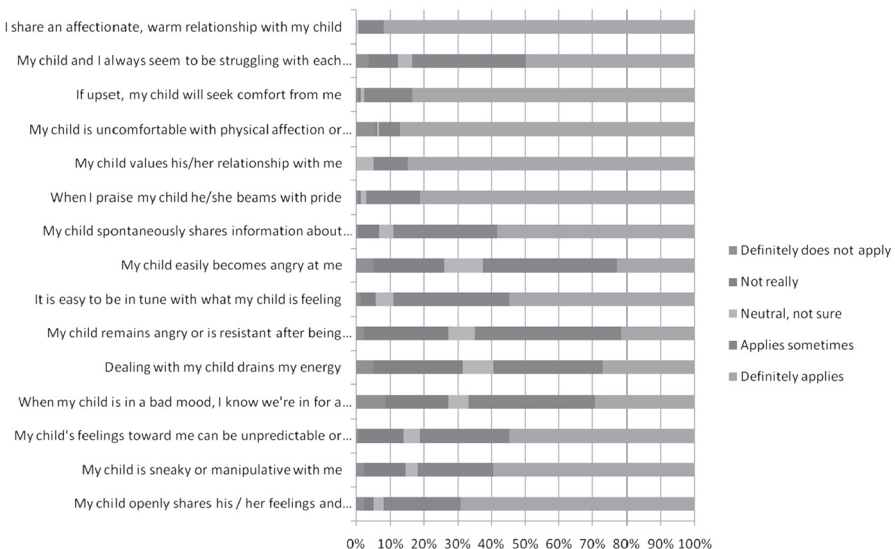

Supplement: MOESM2 [file 9559260]
